# Supplementary material for: A dated phylogeny shows Plio‐Pleistocene climates spurred evolution of antibrowsing defences in the New Zealand flora
Source: PubMed Central journal article supplement — New Phytol. 2021 Oct 21;233(1):546–54. doi: 10.1111/nph.17766 (PMC9298021; doi:10.1111/nph.17766), 2021-10-21
Supplement: NPH-233-546-s002.pdf [file NPH-233-546-s002.pdf]

## **New Phytologist Supporting Information**

Article title: A dated phylogeny shows Plio-Pleistocene climates spurred evolution of anti-browsing defences in the New Zealand flora

Authors: Kévin J. L. Maurin, Rob D. Smissen and Christopher H. Lusk

Article acceptance date: 24 September 2021

The following Supporting Information is available for this article:

**Dataset S1** Set of baits used for the enrichment of the library for chloroplast DNA (see separate file).

**Dataset S2** Alignment of our 215 sequences in PHYLIP format for reconstructing an undated phylogeny with RAxML (see separate file).

**Dataset S3** Partitioning of the PHYLIP alignment (see separate file).

**Dataset S4** treePL configuration file used to date the RAxML-generated trees (see separate file).

**Dataset S5** XML file used for the BEAST2 analysis (see separate file).

**Dataset S6** Geneious file containing the Rubiaceae sequences, which could not be deposited on GenBank (see separate file).

**Figure S1** Dated phylogeny of our 215 species, built with treePL from RAxML-generated trees (in three figures: bootstrap support; 95% confidence intervals on node ages; mean node ages).

**Figure S2** Dated phylogeny of our 215 species, built with BEAST2 (in three figures: posterior probabilities; 95% highest posterior densities on node ages; mean node ages).

**Methods S1** Calibration strategy we designed for our phylogeny.

**Table S1** DNA sequence information for the 215 species used for the phylogenetic analyses.

A list of the references cited in Method S1 and Table S1 is provided at the end of this document.

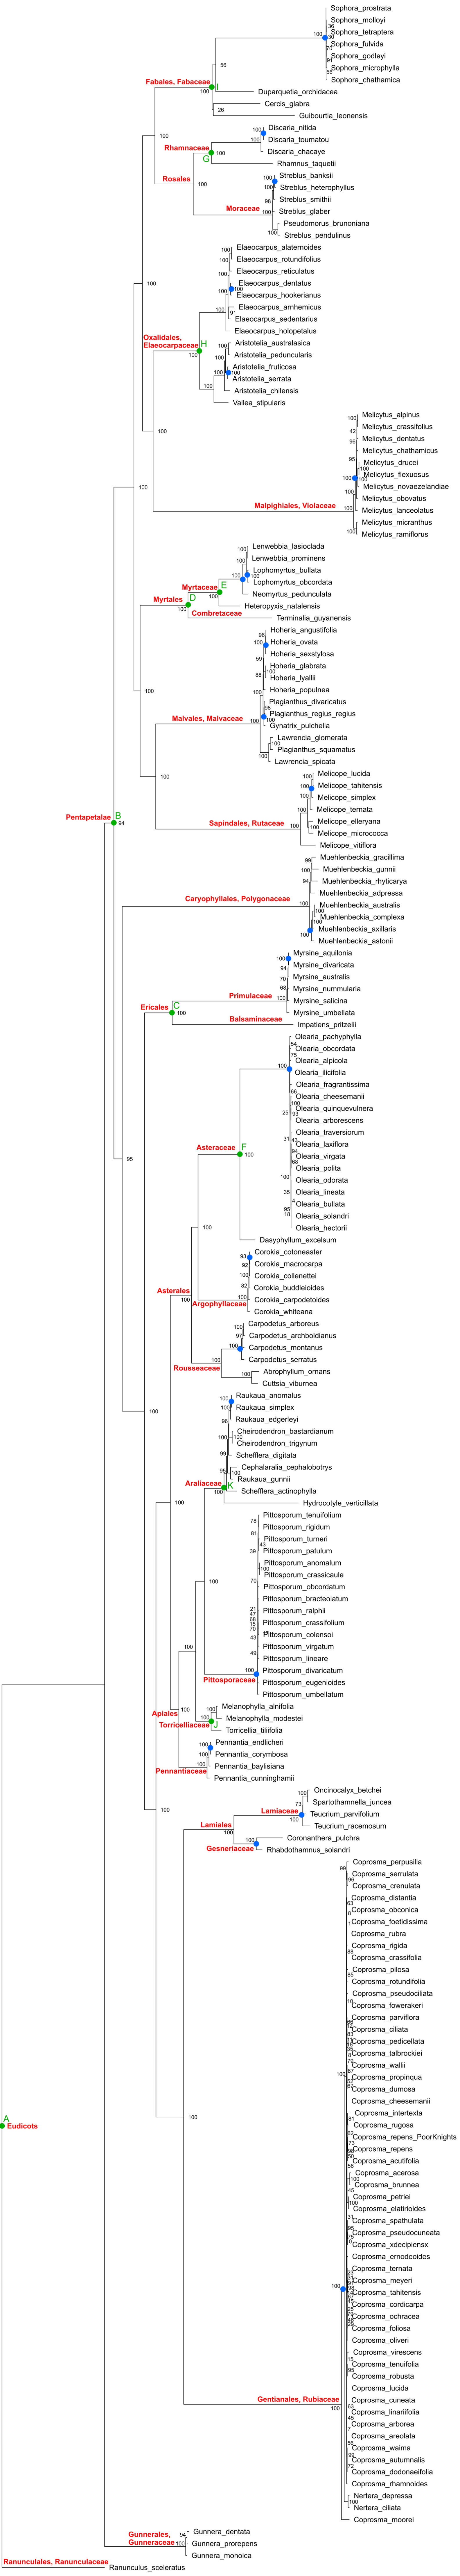

**Fig. S1a** Dated phylogeny of our 215 species, built with treePL from RAXML-generated trees. Names of families, orders and selected higher taxonomic ranks are indicated at the crown node of said ranks. Bootstrap support values are shown on this figure, separately from 95% confidence intervals on node ages (Fig. S1b) and mean node ages (Fig. S1c), to not overload a single figure with too much information. Green dots indicate calibrations, the letter referring to the corresponding letter in Supporting Information Method S1. Blue dots indicate nodes that we conservatively chose as the earliest divergence between divaricate and non-divaricate species or clades for each genus with divaricate representatives (cf. Table 1 in the article).



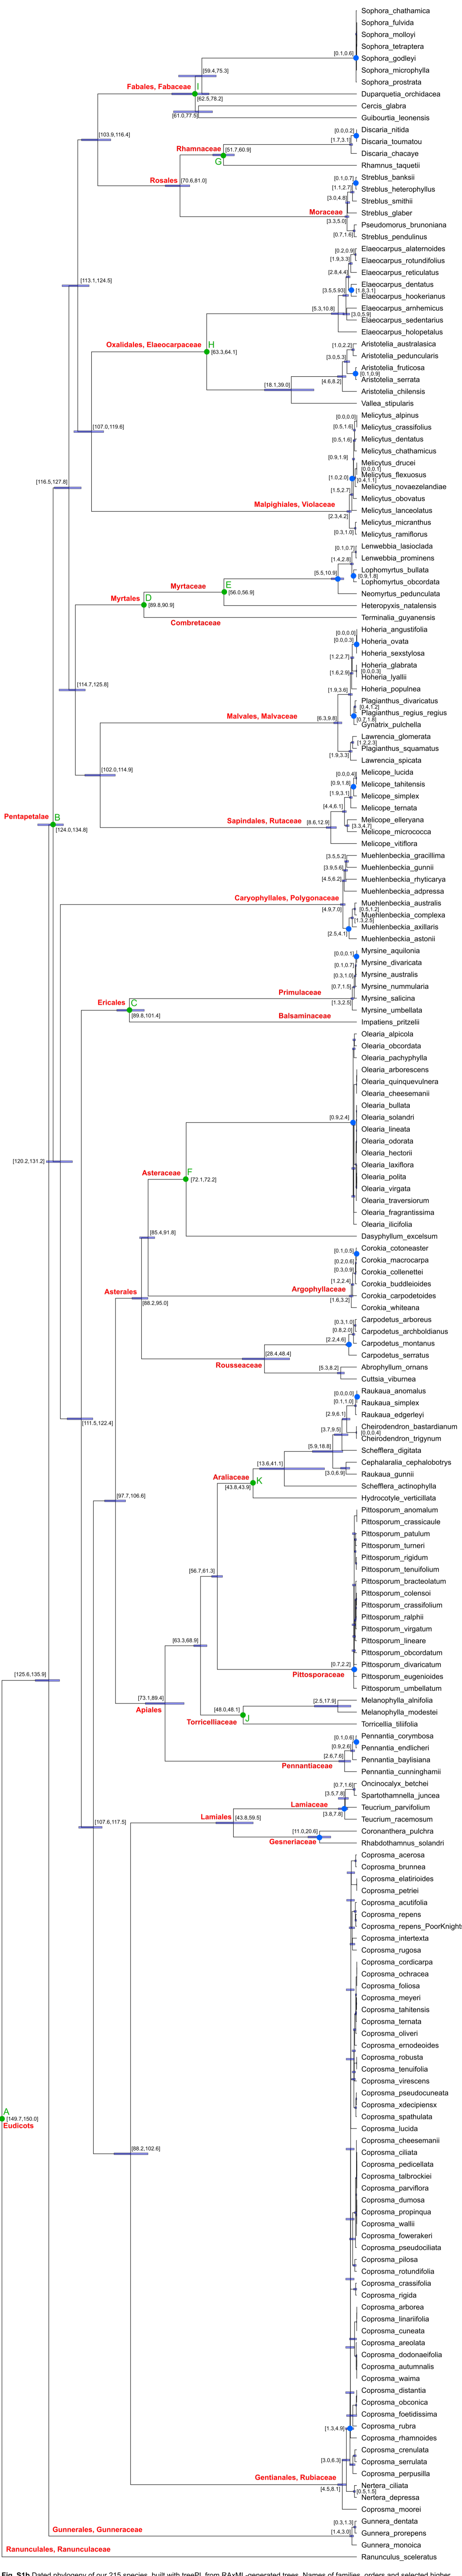

**Fig. S1b** Dated phylogeny of our 215 species, built with treePL from RAXML-generated trees. Names of families, orders and selected higher taxonomic ranks are indicated at the crown node of said ranks. 95% confidence interval on node ages are shown on this figure, separately from bootstrap support values (Fig. S1a) and mean node ages (Fig. S1c), to not overload a single figure with too much information. 95% confidence intervals on ages are removed within the genus *Coprosma* (excluding *C. moorei*), *Olearia*, *Pittosporum* and *Sophora* due to the overall poor support of their nodes (cf. Fig. S1a). Green dots indicate calibrations, the letter referring to the corresponding letter in Supporting Information Method S1. Blue dots indicate nodes that we conservatively chose as the earliest divergence between divaricate and non-divaricate species or clades for each genus with divaricate representatives (cf. Table 1 in the article).



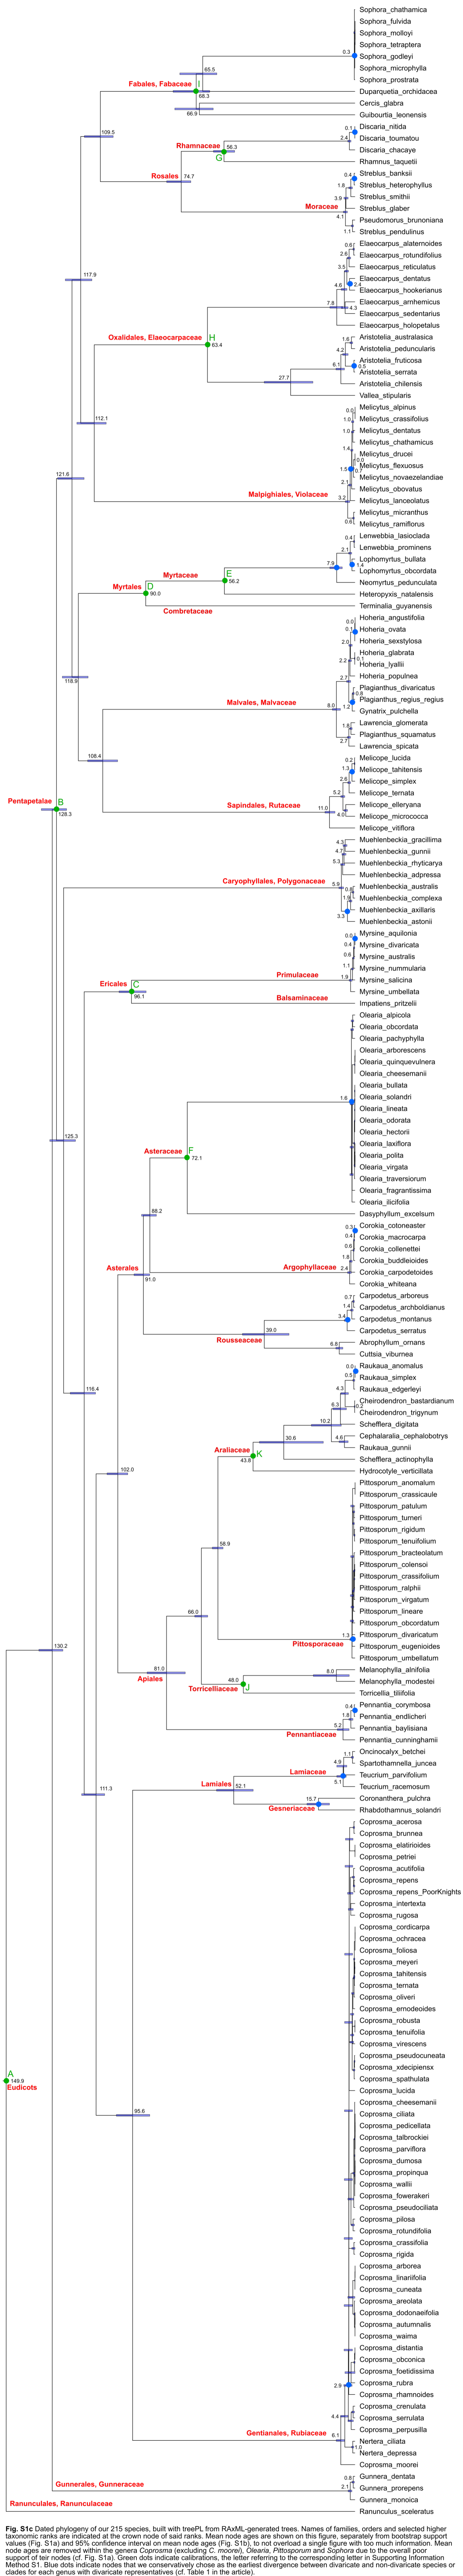



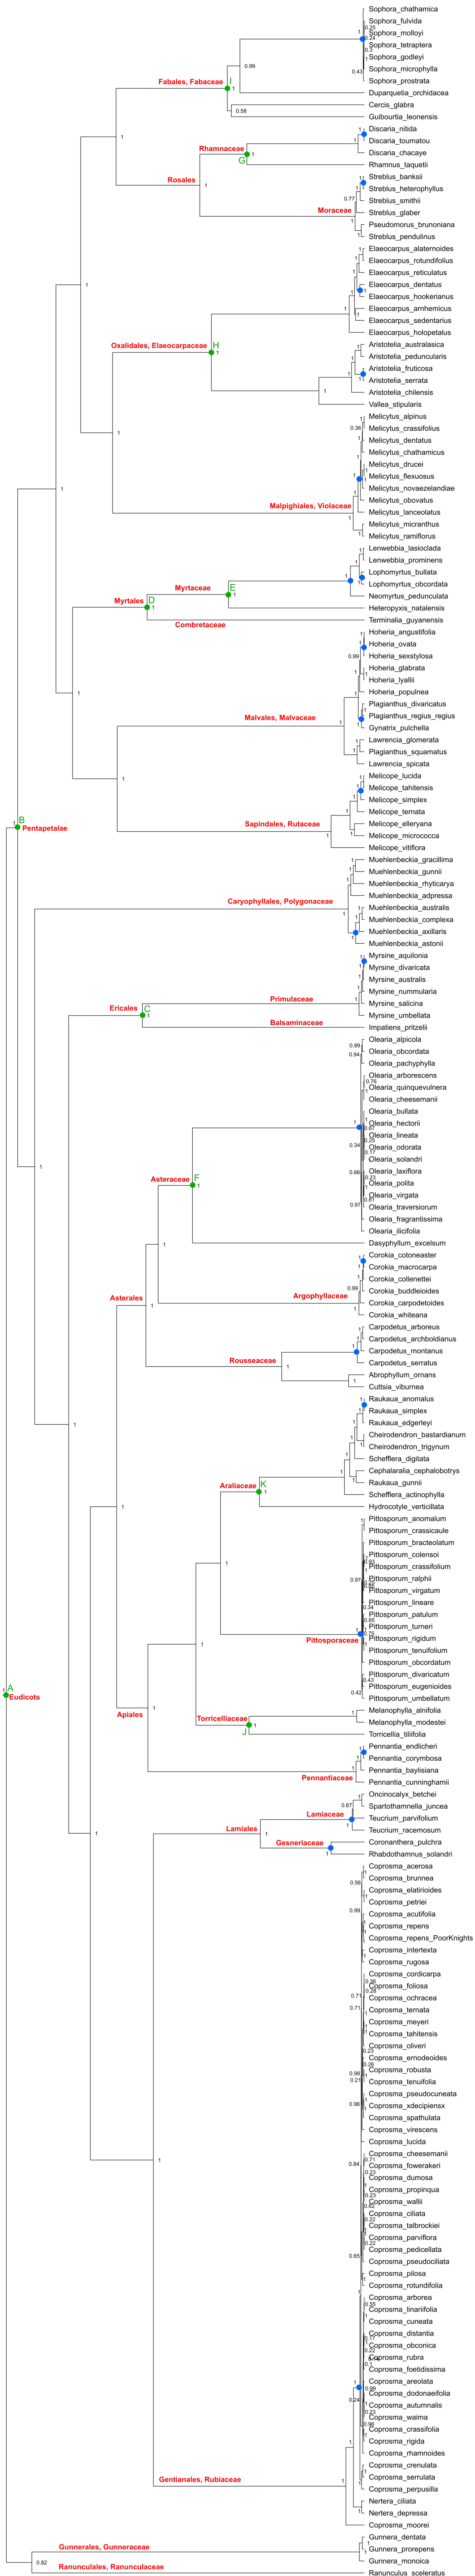

**Fig. S2a** Dated phylogeny of our 215 species, built with BEAST2. Names of families, orders and selected higher taxonomic ranks are indicated at the crown nodes of the tree. Posterior probability values are shown on this figure, separately from 95% highest posterior densities on indicated nodes (Fig. S2b) and mean node ages (Fig. S2c), to not overload a single figure with too much information. Green dots indicate calibrations, the letter referring to the corresponding letter in Supporting Information Method S1. Blue dots indicate nodes where we conservatively chose as the earliest divergence between divaricate and non-divaricate species or clades for each genus with divaricate representatives (cf. Table 1 in the article).



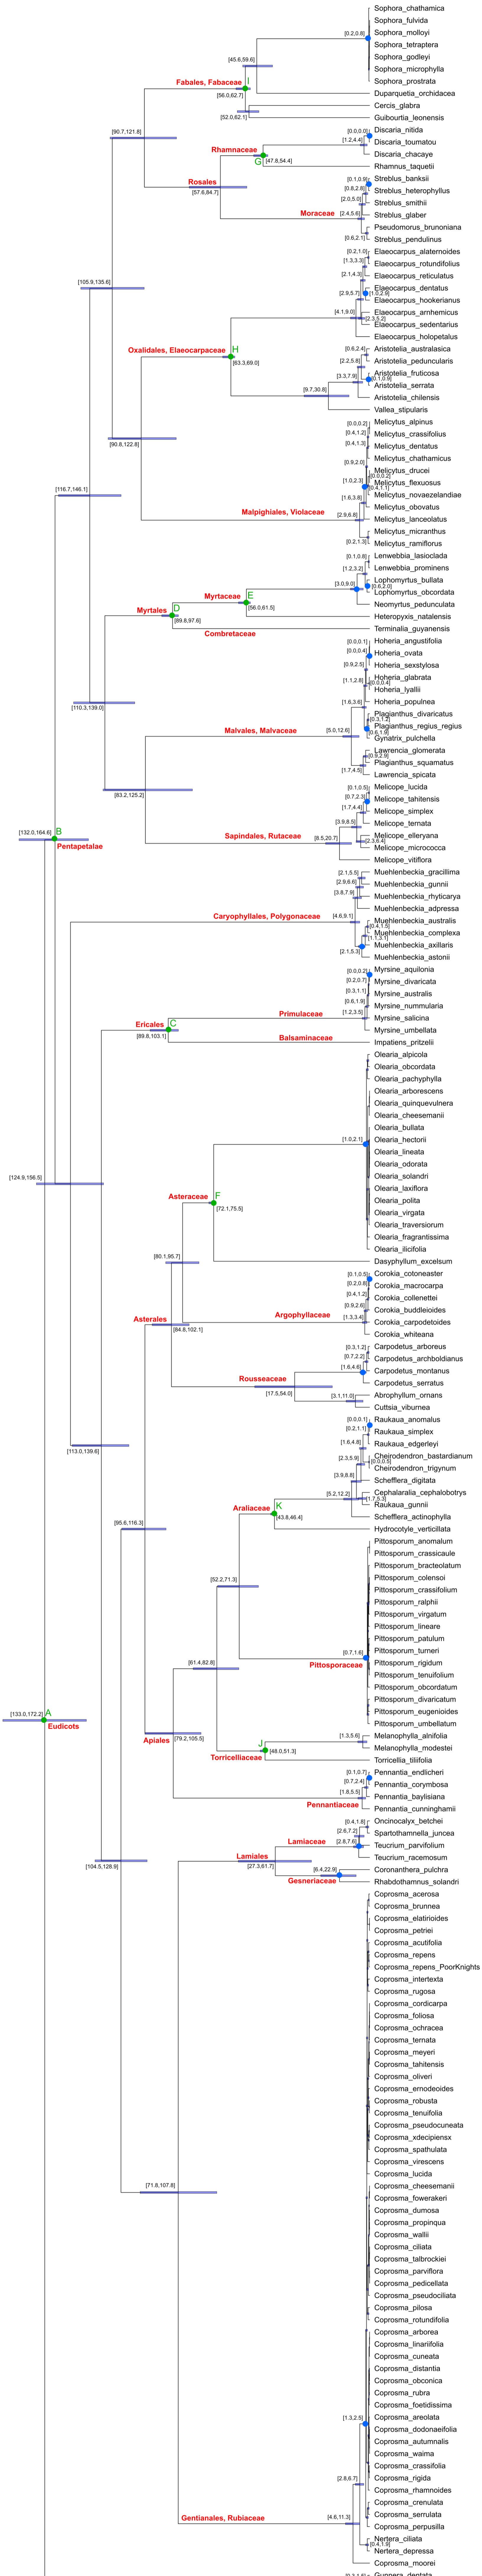

**Fig. S2b** Dated phylogeny of our 215 species, built with BEAST2. Names of families, orders and selected higher taxonomic ranks are indicated at the crown node of said groups. 95% highest posterior densities on node ages are shown on this figure, separately from posterior probability values (Fig. S2a) and mean node ages (Fig. S2c), to not overload a single figure with too much information. 95% highest posterior densities on node ages are removed within the genera *Coprosma* (excluding *C. moorei*), *Olearia*, *Pittosporum* and *Sophora* due to the overall poor support of their nodes (Fig. S2a). Green dots indicate calibrations, the letter referring to the corresponding letter in Supporting Information Method S1. Blue dots indicate nodes that we conservatively chose as the earliest divergence between divaricate and non-divaricate species or clades for each genus with divaricate representatives (cf. Table 1 in the article).



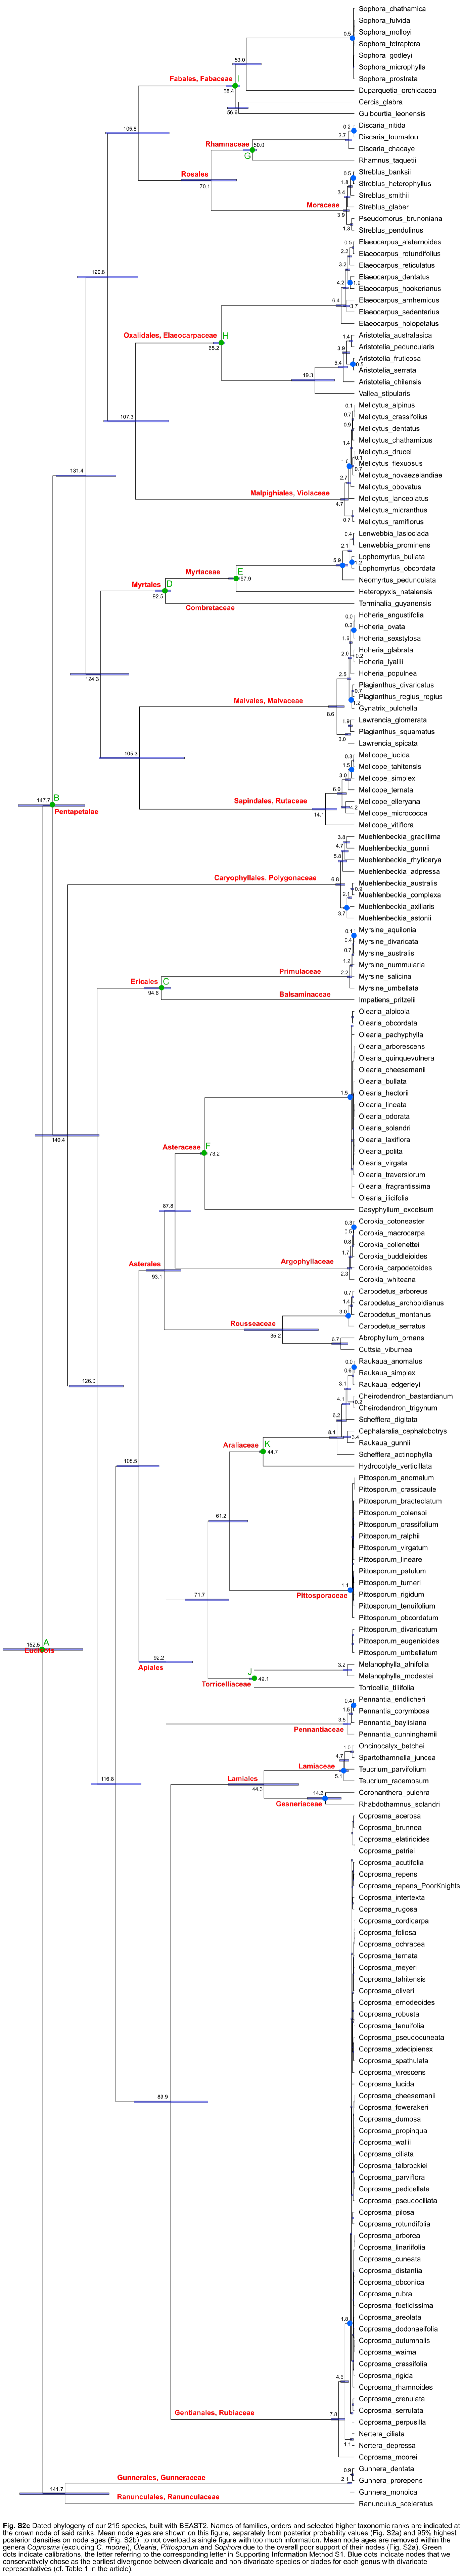

**Fig. S2c** Dated phylogeny of our 215 species, built with BEAST2. Names of families, orders and selected higher taxonomic ranks are indicated at the crown node of said ranks. Mean node ages are shown on this figure, separately from posterior probability values (Fig. S2a) and 95% highest posterior densities on node ages (Fig. S2b), to not overload a single figure with too much information. Mean node ages are removed within the genera *Coprosma* (excluding *C. moorei*), *Olearia*, *Pittosporum* and *Sophora* due to the overall poor support of their nodes (Fig. S2). Green dots indicate calibrations, the letter referring to the corresponding letter in Supporting Information Method S1. Blue dots indicate nodes that we conservatively chose as the earliest divergence between divaricate and non-divaricate species or clades for each genus with divaricate representatives (cf. Table 1 in the article).

**Methods S1** Calibration strategy we designed for our phylogeny.

When chosen calibration ages correspond to boundaries of geological stages, the values were taken from Cohen *et al.* (2013, v. 2020/01). Our choice of fossils and their placement is inspired by Beaulieu *et al.* (2015), Magallón *et al.* (2015), Li *et al.* (2019), Janssens *et al.* (2020), Ramírez-Barahona *et al.* (2020), with adjustments made to better suit our dataset. CG = crown group.

In treePL, all node ages chosen as minimum ages (i.e. all nodes but A) were implemented without defining maximum node ages. The age of the root of the tree (node A) was implemented as a maximum age without a defining a minimum node age.

In BEAST2, all node ages priors were implemented as exponential distributions. Node ages chosen as minimum ages were set as the Offset values of the distributions, and the Mean values were chosen so that the 97.5% quantile of the distributions were about 20% of the minimum age. The age of the root (node A) was implemented with an Offset value of 125 Ma (corresponding to the boundary between the Barremian and the Aptian, see below) and a Mean value chosen so that the 97.5% quantile of the distribution was 150 Ma (see below).

#### **A. Node: root of the tree (CG Eudicotyledons).**

Secondary calibration.

Reference: Stevens (2017)

Calibration: Even though the earliest fossils attributed to the Eudicotyledons date from the Barremian–Aptian (see Magallón *et al.* (2015) and references therein), we decided to use a secondary calibration for this node. We chose this approach because our tests of treePL suggested that the root of the tree should be calibrated with its oldest sensible age: 150 Ma is the common oldest boundary of age estimates of the crown of Eudicots (Stevens, 2017), so we chose this date as the maximum age for this node.

#### **B. Node: CG Pentapetalae.**

Fossil: Unnamed pentamerous flower

Stratigraphy and locality: Rose Creek locality of the Dakota Formation, Nebraska, USA.

Reference: Basinger & Dilcher (1984)

Calibration: The age of the Rose Creek locality is estimated to be Late Albian–Early Cenomanian (Doyle & Endress, 2010; Friis *et al.*, 2011). We therefore chose the upper boundary of the Albian, 100.5 Ma, as a minimum age for this node.

#### **C. Node: CG Ericales.**

Fossil: (1) *Paleoenkianthus sayrevillensis* Nixon & Crepet, (2) *Pentapetalum trifasciculandricus* Martínez-Millán, Crepet & Nixon

Stratigraphy and locality: Old Crossman Clay Pit locality of the Raritan Formation, New Jersey, USA.

Reference: (1) Nixon & Crepet (1993), (2) Martínez-Millán *et al.* (2009)

Calibration: The Raritan formation is estimated to be of Turonian age (Nixon & Crepet, 1993; Martínez-Millán *et al.*, 2009). We therefore chose the upper boundary of the Turonian, 89.8 Ma, as a minimum age for this node.



#### **D. Node: CG Myrtales.**

Fossil: *Esgueiria futabensis* Takahashi, Crane & Ando

Stratigraphy and locality: Kamikitaba assemblage, Asamigawa Member of the Ashizawa Formation, Fukushima Prefecture, Japan.

Reference: Takahashi *et al.* (1999)

Calibration: The Asamigawa Member is estimated to be from the Lower Coniacian (Takahashi *et al.*, 1999). We therefore chose the lower boundary of the Coniacian, 89.8 Ma, as a minimum age for this node.

#### **E. Node: CG Myrtaceae.**

Fossil: *Paleomyrtinaea* Pigg, Stockey & Maxwell

Stratigraphy and locality: Princeton Chert, British Columbia, Canada and Sentinel Butte Formation of the Fort Union Group, Almont, North Dakota, USA.

Reference: Crane *et al.* (1990), Pigg *et al.* (1993)

Calibration: The Princeton Chert and the Sentinel Butte Formation are estimated to be of Middle Eocene and Mid/Upper Paleocene age (Crane *et al.*, 1990; Pigg *et al.*, 1993), respectively. We therefore chose the upper boundary of the Paleocene, 56 Ma, as a minimum age for this node.

#### **F. Node: CG Asteraceae.**

Fossil: *Tubulifloridites lilliei* (Couper) Farabee & Canright

Stratigraphy and locality: Snow Hill Island Formation and López de Bertodano Formation, James Ross Island and Vega, Antarctica.

Reference: Barreda *et al.* (2015)

Calibration: The age of the López de Bertodano Formation and the Snow Hill Island Formation cover, respectively, the Maastrichtian and the Late Campanian (Olivero, 2012). We therefore chose the upper boundary of the Campanian, 72.1 Ma, as a minimum age for this node.

#### **G. Node: CG Rhamnaceae.**

Fossil: *Paliurus* sp.

Stratigraphy and locality: Wind River Formation, Wyoming, USA.

Reference: Manchester (1999)

Calibration: This fossil was dated at the Early Eocene within the Wind River Formation (Manchester, 1999). We therefore chose the upper boundary of the earliest stage of the Eocene (the Ypresian), 47.8 Ma, as a minimum age for this node.

#### **H. Node: CG Elaeocarpaceae.**

Fossil: *Sloanea ungeri* (Heer) Manchester & Kvaček

Stratigraphy and locality: Great Plains regions, North America

Reference: Manchester & Kvaček (2009)

Calibration: The fossils of *Sloanea ungeri* range from Puercan to Early Eocene (Manchester & Kvaček, 2009), so we chose the upper boundary of the Puercan, 63.3 Ma (Fossilworks, n. d.), as a minimum age for this node.

### **I. Node: CG Fabaceae.**

Fossil: diverse Fabaceae

Stratigraphy and locality: various localities

Reference: Herendeen *et al.* (1992)

Calibration: Herendeen *et al.* (1992) report that the earliest occurrences of reliable fossils of different Fabaceae subfamilies were found in the Upper Paleocene. We therefore chose the upper boundary of the Paleocene, 56 Ma, as a minimum age for this node.

### **J. Node: CG Torricelliaceae.**

Fossil: *Toricellia bonesii* (Manch.) Manch.

Stratigraphy and locality: Messel maar lake, Darmstadt, Germany.

Reference: Collinson (1988), Collinson *et al.* (2012) (cited in Manchester *et al.* (2017))

Calibration: Upon re-examining fossils of *Toricellia*—the only fossil *Toricelliaceae* genus until the fossil published by Manchester *et al.* (2020, Plunkett *et al.*, 2018)—Manchester *et al.* (2017) concluded that the oldest confirmed fossil of Torricelliaceae is from the Messel maar lake; we therefore assigned this fossil to the crown node of the family. The age of the Messel maar lake is considered to be ca. 48 Ma old (Lenz *et al.*, 2015), so we chose this value as a minimum age for this node. We disregarded a recently published Torricelliaceae fossil species from the Maastrichtian because it was tentatively considered a “potential member” of the family whose occurrence “would be” the earliest known fossil of the family (Manchester *et al.*, 2020).

### **K. Node: CG Araliaceae.**

Fossil: *Paleopanax oregonensis* Manchester

Stratigraphy and locality: Nut Beds locality of the Clarno Formation, Oregon, USA.

Reference: Manchester (1994)

Calibration: The Nut Beds is estimated to be no younger than 43.8 Ma old (Dillhoff *et al.*, 2009) and references therein); we therefore chose this value as a minimum age for this node.



**Table S1** Sampling plan for this study. GenBank numbers are provided when available, with the reference to the study where they were first published. If no GenBank number is available, the herbarium accession number is provided instead — some samples are still awaiting accession. Species highlighted in blue are divaricates. Rubiaceae sequences are provided in a Geneious file (see Data Availability statement) because they could not be deposited in GenBank.

Herbarium codes:

- AK = Auckland War Memorial Museum, Auckland, New Zealand
- CHR = Allan Herbarium, Lincoln, New Zealand
- PAP = Herbier de la Polynésie française, Tahiti, French Polynesia
- PERTH = Western Australian Herbarium, Perth, Australia
- PTBG = National Tropical Botanical Garden, Hawaii, USA
- SFSU = San Francisco State University, San Francisco, USA
- WU = Universität Wien, Vienna, Austria

| Order     | Family         | Taxon                                                        | Source                                |
|-----------|----------------|--------------------------------------------------------------|---------------------------------------|
| Apiales   | Araliaceae     | <i>Cephalalaria cephalobotrys</i> (F.Muell.) Harms           | MW183403 (this study)                 |
| Apiales   | Araliaceae     | <i>Cheirodendron bastardianum</i> (Decne.) Frodin            | MT385071 (Maurin, 2020)               |
| Apiales   | Araliaceae     | <i>Cheirodendron trigynum</i> (Gaudich.) A.Heller            | MW183404 (this study)                 |
| Apiales   | Araliaceae     | <i>Hydrocotyle verticillata</i> Thunb.                       | HM596070 (Downie & Jansen, 2015)      |
| Apiales   | Araliaceae     | <i>Raukaua anomalus</i> (Hook.) A.D.Mitch., Frodin & Heads   | MT385080 (Maurin, 2020)               |
| Apiales   | Araliaceae     | <i>Raukaua edgerleyi</i> (Hook.f.) Seem.                     | MT385081 (Maurin, 2020)               |
| Apiales   | Araliaceae     | <i>Raukaua gunnii</i> (Hook.f.) Frodin                       | MW183405 (this study)                 |
| Apiales   | Araliaceae     | <i>Raukaua simplex</i> (G.Forst.) A.D.Mitch., Frodin & Heads | MT385082 (Maurin, 2020)               |
| Apiales   | Araliaceae     | <i>Schefflera actinophylla</i> (Endl.) Harms                 | MT385083 (Maurin, 2020)               |
| Apiales   | Araliaceae     | <i>Schefflera digitata</i> J.R.Forst. & G.Forst.             | MT385084 (Maurin, 2020)               |
| Apiales   | Pennantiaceae  | <i>Pennantia baylisiana</i> (Oliv.) G.T.S.Baylis             | MT385075 (Maurin, 2020)               |
| Apiales   | Pennantiaceae  | <i>Pennantia corymbosa</i> J.R.Forst. & G.Forst.             | MT385076 (Maurin, 2020)               |
| Apiales   | Pennantiaceae  | <i>Pennantia cunninghamii</i> Miers                          | MT385077 (Maurin, 2020)               |
| Apiales   | Pennantiaceae  | <i>Pennantia endlicheri</i> Reissek                          | MT385078 (Maurin, 2020)               |
| Apiales   | Pittosporaceae | <i>Pittosporum anomalum</i> Laing & Gourlay                  | MW191866 (this study)                 |
| Apiales   | Pittosporaceae | <i>Pittosporum bracteolatum</i> Endl.                        | MW191867 (this study)                 |
| Apiales   | Pittosporaceae | <i>Pittosporum colensoi</i> Hook. f.                         | MW191868 (this study)                 |
| Apiales   | Pittosporaceae | <i>Pittosporum crassicaule</i> Cockayne ex Laing & Gourlay   | MW191869 (this study)                 |
| Apiales   | Pittosporaceae | <i>Pittosporum crassifolium</i> Banks & Sol. ex A.Cunn.      | MW191870 (this study)                 |
| Apiales   | Pittosporaceae | <i>Pittosporum divaricatum</i> Cockayne                      | MW191871 (this study)                 |
| Apiales   | Pittosporaceae | <i>Pittosporum eugenioides</i> A. Cunn.                      | MT385079 (Maurin, 2020)               |
| Apiales   | Pittosporaceae | <i>Pittosporum lineare</i> Laing & Gourlay                   | MW191872 (this study)                 |
| Apiales   | Pittosporaceae | <i>Pittosporum obcordatum</i> Raoul                          | MW191873 (this study)                 |
| Apiales   | Pittosporaceae | <i>Pittosporum patulum</i> Hook. f.                          | MW191874 (this study)                 |
| Apiales   | Pittosporaceae | <i>Pittosporum ralphii</i> Kirk                              | MW191875 (this study)                 |
| Apiales   | Pittosporaceae | <i>Pittosporum rigidum</i> Hook. f.                          | MW191876 (this study)                 |
| Apiales   | Pittosporaceae | <i>Pittosporum tenuifolium</i> Banks & Sol. ex Gaertn.       | MW191877 (this study)                 |
| Apiales   | Pittosporaceae | <i>Pittosporum turneri</i> Petrie                            | MW191878 (this study)                 |
| Apiales   | Pittosporaceae | <i>Pittosporum umbellatum</i> Banks & Sol. ex Gaertn.        | MW191879 (this study)                 |
| Apiales   | Pittosporaceae | <i>Pittosporum virgatum</i> Kirk                             | MW191880 (this study)                 |
| Apiales   | Toricelliaceae | <i>Melanophylla alnifolia</i> Baker                          | MT385073 (Maurin, 2020)               |
| Apiales   | Toricelliaceae | <i>Melanophylla modestei</i> G.E.Schatz & al.                | MT385074 (Maurin, 2020)               |
| Apiales   | Toricelliaceae | <i>Toricellia tiliifolia</i> DC.                             | NC040944 (Yao <i>et al.</i> , 2019)   |
| Asterales | Argophyllaceae | <i>Corokia buddleoides</i> A.Cunn.                           | MW194049 (this study)                 |
| Asterales | Argophyllaceae | <i>Corokia carpodetooides</i> (F.Muell.) L.S.Sm.             | MW194050 (this study)                 |
| Asterales | Argophyllaceae | <i>Corokia collenettei</i> L.Riley                           | MW194051 (this study)                 |
| Asterales | Argophyllaceae | <i>Corokia cotoneaster</i> Raoul                             | MT385072 (Maurin, 2020)               |
| Asterales | Argophyllaceae | <i>Corokia macrocarpa</i> Kirk                               | MW194052 (this study)                 |
| Asterales | Argophyllaceae | <i>Corokia whiteana</i> L.S.Sm.                              | MW194053 (this study)                 |
| Asterales | Asteraceae     | <i>Dasyphyllum excelsum</i> (D.Don) Cabrera                  | MH899017 (Gruenstaeudl & Jenke, 2020) |
| Asterales | Asteraceae     | <i>Olearia alpicola</i> (F.Muell.) F.Muell. ex Benth.        | MW229247 (this study)                 |
| Asterales | Asteraceae     | <i>Olearia arborescens</i> (G.Forst.) Cockayne & Laing       | MW229248 (this study)                 |
| Asterales | Asteraceae     | <i>Olearia bullata</i> H.D.Wilson & Garn.-Jones              | MW229249 (this study)                 |
| Asterales | Asteraceae     | <i>Olearia cheesemaniae</i> Cockayne & Allan                 | MW229250 (this study)                 |
| Asterales | Asteraceae     | <i>Olearia fragrantissima</i> Petrie                         | MW229251 (this study)                 |
| Asterales | Asteraceae     | <i>Olearia hectorii</i> Hook.f.                              | MW229252 (this study)                 |
| Asterales | Asteraceae     | <i>Olearia ilicifolia</i> Hook.f.                            | MW229253 (this study)                 |
| Asterales | Asteraceae     | <i>Olearia laxiflora</i> Kirk                                | MW229254 (this study)                 |
| Asterales | Asteraceae     | <i>Olearia lineata</i> (Kirk) Cockayne                       | MW229255 (this study)                 |

|                |               |                                                              |                                       |
|----------------|---------------|--------------------------------------------------------------|---------------------------------------|
| Asterales      | Asteraceae    | <i>Olearia obcordata</i> (Hook.f.) Benth.                    | MW229256 (this study)                 |
| Asterales      | Asteraceae    | <i>Olearia odorata</i> Petrie                                | MW229257 (this study)                 |
| Asterales      | Asteraceae    | <i>Olearia pachyphylla</i> Cheeseman                         | MW229258 (this study)                 |
| Asterales      | Asteraceae    | <i>Olearia polita</i> H.D.Wilson & Garn.-Jones               | MW229259 (this study)                 |
| Asterales      | Asteraceae    | <i>Olearia quinquevulnera</i> Heenan                         | MW229260 (this study)                 |
| Asterales      | Asteraceae    | <i>Olearia solandri</i> (Hook.f.) Hook.f.                    | MW229261 (this study)                 |
| Asterales      | Asteraceae    | <i>Olearia traversiorum</i> (F.Muell.) Hook.f.               | MW229262 (this study)                 |
| Asterales      | Asteraceae    | <i>Olearia virgata</i> (Hook.f.) Hook.f.                     | MW229263 (this study)                 |
| Asterales      | Rousseaceae   | <i>Abrophyllum ornans</i> (F.Muell.) Hook.f.                 | MW246782 (this study)                 |
| Asterales      | Rousseaceae   | <i>Carpodetus arboreus</i> (Lauterb. & K.Schum.) Schltr.     | MW246783 (this study)                 |
| Asterales      | Rousseaceae   | <i>Carpodetus archboldianus</i> Reeder                       | MW246784 (this study)                 |
| Asterales      | Rousseaceae   | <i>Carpodetus montanus</i> (Ridl.) Reeder                    | MW246785 (this study)                 |
| Asterales      | Rousseaceae   | <i>Carpodetus serratus</i> J.R.Forst. & G.Forst.             | MW246786 (this study)                 |
| Asterales      | Rousseaceae   | <i>Cuttsia viburnea</i> F.Muell.                             | MW246787 (this study)                 |
| Caryophyllales | Polygonaceae  | <i>Muehlenbeckia adpressa</i> Meisn.                         | MW148933 (this study)                 |
| Caryophyllales | Polygonaceae  | <i>Muehlenbeckia astonii</i> Petrie                          | MW148934 (this study)                 |
| Caryophyllales | Polygonaceae  | <i>Muehlenbeckia australis</i> (G. Forst.) Meisn.            | MW148935 (this study)                 |
| Caryophyllales | Polygonaceae  | <i>Muehlenbeckia axillaris</i> (Hook.f.) Endl.               | MW148936 (this study)                 |
| Caryophyllales | Polygonaceae  | <i>Muehlenbeckia complexa</i> (A.Cunn.) Meisn.               | MW148937 (this study)                 |
| Caryophyllales | Polygonaceae  | <i>Muehlenbeckia gracillima</i> Meisn.                       | MW148938 (this study)                 |
| Caryophyllales | Polygonaceae  | <i>Muehlenbeckia gunnii</i> Walp.                            | MW148939 (this study)                 |
| Caryophyllales | Polygonaceae  | <i>Muehlenbeckia rhyticarya</i> F.Muell. ex Benth.           | MW148940 (this study)                 |
| Ericales       | Balsaminaceae | <i>Impatiens pritzelii</i> Hook. f.                          | MN418389 (Wang <i>et al.</i> , 2019)  |
| Ericales       | Primulaceae   | <i>Myrsine aquilonia</i> de Lange & Heenan                   | MW246776 (this study)                 |
| Ericales       | Primulaceae   | <i>Myrsine australis</i> (A.Rich.) Allan                     | MW246777 (this study)                 |
| Ericales       | Primulaceae   | <i>Myrsine divaricata</i> A. Cunn.                           | MW246778 (this study)                 |
| Ericales       | Primulaceae   | <i>Myrsine nummularia</i> (Hook. f.) Hook. f.                | MW246779 (this study)                 |
| Ericales       | Primulaceae   | <i>Myrsine salicina</i> Heward ex Hook.f.                    | MW246780 (this study)                 |
| Ericales       | Primulaceae   | <i>Myrsine umbellata</i> Mart.                               | MW246781 (this study)                 |
| Fabales        | Fabaceae      | <i>Cercis glabra</i> Pamp.                                   | KY806281 (Wang <i>et al.</i> , 2017)  |
| Fabales        | Fabaceae      | <i>Duparquetia orchidacea</i> Baill.                         | MN709829 (Zhang <i>et al.</i> , 2020) |
| Fabales        | Fabaceae      | <i>Guibourtia leonensis</i> J.Leonard                        | MG564755 (Tosso <i>et al.</i> , 2018) |
| Fabales        | Fabaceae      | <i>Sophora chathamica</i> Cockayne                           | MW191851 (this study)                 |
| Fabales        | Fabaceae      | <i>Sophora fulvida</i> (Allan) Heenan & de Lange             | MW191852 (this study)                 |
| Fabales        | Fabaceae      | <i>Sophora godleyi</i> Heenan & de Lange                     | MW191853 (this study)                 |
| Fabales        | Fabaceae      | <i>Sophora microphylla</i> Aiton                             | MW191854 (this study)                 |
| Fabales        | Fabaceae      | <i>Sophora molloyi</i> Heenan & de Lange                     | MW191855 (this study)                 |
| Fabales        | Fabaceae      | <i>Sophora prostrata</i> Buchanan                            | MW191856 (this study)                 |
| Fabales        | Fabaceae      | <i>Sophora tetraptera</i> J.F.Mill.                          | MW191857 (this study)                 |
| Gentianales    | Rubiaceae     | <i>Coprosma</i> "decipiens"                                  | AK 236876                             |
| Gentianales    | Rubiaceae     | <i>Coprosma acerosa</i> A.Cunn.                              | PTBG                                  |
| Gentianales    | Rubiaceae     | <i>Coprosma acutifolia</i> Hook. f.                          | AK 305635                             |
| Gentianales    | Rubiaceae     | <i>Coprosma arborea</i> Kirk                                 | AK 304876                             |
| Gentianales    | Rubiaceae     | <i>Coprosma areolata</i> Cheeseman                           | PTBG                                  |
| Gentianales    | Rubiaceae     | <i>Coprosma autumnalis</i> Colenso                           | PTBG                                  |
| Gentianales    | Rubiaceae     | <i>Coprosma brunnea</i> (Kirk) Cockayne ex Cheeseman         | PTBG                                  |
| Gentianales    | Rubiaceae     | <i>Coprosma cheesemanii</i> W.R.B.Oliv.                      | PTBG                                  |
| Gentianales    | Rubiaceae     | <i>Coprosma ciliata</i> Hook.f.                              | PTBG                                  |
| Gentianales    | Rubiaceae     | <i>Coprosma cordicarpa</i> J. Cantley, Sporck-Koehler & Chau | PTBG                                  |
| Gentianales    | Rubiaceae     | <i>Coprosma crassifolia</i> Colenso                          | PTBG                                  |
| Gentianales    | Rubiaceae     | <i>Coprosma crenulata</i> W.R.B.Oliv.                        | PTBG                                  |
| Gentianales    | Rubiaceae     | <i>Coprosma cuneata</i> Hook.f.                              | PERTH                                 |
| Gentianales    | Rubiaceae     | <i>Coprosma distantia</i> (de Lange & R.O.Gardner) de Lange  | AK 322617                             |
| Gentianales    | Rubiaceae     | <i>Coprosma dodonaeifolia</i> W.R.B.Oliv.                    | CHR 606211                            |
| Gentianales    | Rubiaceae     | <i>Coprosma dumosa</i> (Cheeseman) G.T.Jane                  | PTBG                                  |
| Gentianales    | Rubiaceae     | <i>Coprosma elatirioides</i> de Lange & A.S.Markey           | PTBG                                  |
| Gentianales    | Rubiaceae     | <i>Coprosma ernodeoides</i> A.Gray                           | SFSU                                  |
| Gentianales    | Rubiaceae     | <i>Coprosma foetidissima</i> J.R.Forst. & G.Forst.           | PTBG                                  |
| Gentianales    | Rubiaceae     | <i>Coprosma foliosa</i> A.Gray                               | PTBG                                  |
| Gentianales    | Rubiaceae     | <i>Coprosma fowerakeri</i> D.A.Norton & de Lange             | PTBG                                  |
| Gentianales    | Rubiaceae     | <i>Coprosma intertexta</i> G. Simpson                        | PTBG                                  |
| Gentianales    | Rubiaceae     | <i>Coprosma linariifolia</i> Hook.f.                         | CHR 639402                            |
| Gentianales    | Rubiaceae     | <i>Coprosma lucida</i> J.R.Forst. & G.Forst.                 | CHR 639372                            |
| Gentianales    | Rubiaceae     | <i>Coprosma meyeri</i> W.L.Wagner & Lorence                  | PTBG                                  |
| Gentianales    | Rubiaceae     | <i>Coprosma moorei</i> F.Muell. ex Rodway                    | PERTH                                 |
| Gentianales    | Rubiaceae     | <i>Coprosma obconica</i> Kirk                                | PTBG                                  |



|              |              |                                                                  |                                           |
|--------------|--------------|------------------------------------------------------------------|-------------------------------------------|
| Gentianales  | Rubiaceae    | <i>Coprosma ochracea</i> W.R.B.Oliv.                             | PTBG                                      |
| Gentianales  | Rubiaceae    | <i>Coprosma oliveri</i> Fosberg                                  | WU                                        |
| Gentianales  | Rubiaceae    | <i>Coprosma parviflora</i> Hook.f.                               | PTBG                                      |
| Gentianales  | Rubiaceae    | <i>Coprosma pedicellata</i> Molloy, de Lange & B.D.Clarkson      | AK 316376                                 |
| Gentianales  | Rubiaceae    | <i>Coprosma perpusilla</i> Colenso                               | PTBG                                      |
| Gentianales  | Rubiaceae    | <i>Coprosma petriei</i> Cheeseman                                | PTBG                                      |
| Gentianales  | Rubiaceae    | <i>Coprosma pilosa</i> Endl.                                     | AK 297246                                 |
| Gentianales  | Rubiaceae    | <i>Coprosma propinqua</i> A.Cunn.                                | CHR 639412                                |
| Gentianales  | Rubiaceae    | <i>Coprosma pseudociliata</i> G.T.Jane                           | AK 229039                                 |
| Gentianales  | Rubiaceae    | <i>Coprosma pseudocuneata</i> W.R.B.Oliv. ex Garn.-Jones & Elder | PTBG                                      |
| Gentianales  | Rubiaceae    | <i>Coprosma repens</i> "Poor Knights form"                       | PTBG                                      |
| Gentianales  | Rubiaceae    | <i>Coprosma repens</i> A.Rich.                                   | CHR 595644                                |
| Gentianales  | Rubiaceae    | <i>Coprosma rhamnoides</i> A.Cunn.                               | PTBG                                      |
| Gentianales  | Rubiaceae    | <i>Coprosma rigida</i> Cheeseman                                 | CHR 639416                                |
| Gentianales  | Rubiaceae    | <i>Coprosma robusta</i> Raoul                                    | PTBG                                      |
| Gentianales  | Rubiaceae    | <i>Coprosma rotundifolia</i> A.Cunn.                             | CHR 639409                                |
| Gentianales  | Rubiaceae    | <i>Coprosma rubra</i> Petrie                                     | PTBG                                      |
| Gentianales  | Rubiaceae    | <i>Coprosma rugosa</i> Cheeseman                                 | PTBG                                      |
| Gentianales  | Rubiaceae    | <i>Coprosma serrulata</i> Hook.f. ex Buchanan                    | PTBG                                      |
| Gentianales  | Rubiaceae    | <i>Coprosma spathulata</i> A.Cunn.                               | CHR 649665                                |
| Gentianales  | Rubiaceae    | <i>Coprosma tahitensis</i> A.Gray                                | PAP                                       |
| Gentianales  | Rubiaceae    | <i>Coprosma talbrockiei</i> L.B.Moore & R.Mason                  | CHR 476107                                |
| Gentianales  | Rubiaceae    | <i>Coprosma tenuifolia</i> Cheeseman                             | PTBG                                      |
| Gentianales  | Rubiaceae    | <i>Coprosma ternata</i> W.R.B.Oliv.                              | SFSU                                      |
| Gentianales  | Rubiaceae    | <i>Coprosma virescens</i> Petrie                                 | PTBG                                      |
| Gentianales  | Rubiaceae    | <i>Coprosma waima</i> A.P.Druce                                  | PTBG                                      |
| Gentianales  | Rubiaceae    | <i>Coprosma wallii</i> Petrie                                    | PTBG                                      |
| Gentianales  | Rubiaceae    | <i>Nertera ciliata</i> Kirk                                      | PERTH                                     |
| Gentianales  | Rubiaceae    | <i>Nertera depressa</i> Banks & Sol. ex Gaertn.                  | PTBG                                      |
| Gunnerales   | Gunneraceae  | <i>Gunnera dentata</i> Kirk                                      | MW218452 (this study)                     |
| Gunnerales   | Gunneraceae  | <i>Gunnera monoica</i> Raoul                                     | MW218453 (this study)                     |
| Gunnerales   | Gunneraceae  | <i>Gunnera prorepens</i> Hook.f.                                 | MW218454 (this study)                     |
| Lamiales     | Gesneriaceae | <i>Coronanthera pulchra</i> C.B.Clarke                           | MW242810 (this study)                     |
| Lamiales     | Gesneriaceae | <i>Rhabdothamnus solandri</i> A.Cunn.                            | MW242811 (this study)                     |
| Lamiales     | Lamiaceae    | <i>Oncinocalyx betchei</i> F.Muell.                              | MW238399 (this study)                     |
| Lamiales     | Lamiaceae    | <i>Spartothamnella juncea</i> (A.Cunn. ex Walp.) Briq.           | MW238400 (this study)                     |
| Lamiales     | Lamiaceae    | <i>Teucrium parvifolium</i> (Hook.f.) Kattari & Salmaki          | MW238401 (this study)                     |
| Lamiales     | Lamiaceae    | <i>Teucrium racemosum</i> R.Br.                                  | MW238402 (this study)                     |
| Malpighiales | Violaceae    | <i>Melicytus alpinus</i> (Kirk) Garn.-Jones                      | MW238803 (this study)                     |
| Malpighiales | Violaceae    | <i>Melicytus chathamicus</i> (F. Muell.) Garn.-Jones             | MW238804 (this study)                     |
| Malpighiales | Violaceae    | <i>Melicytus crassifolius</i> (Hook.f.) Garn.-Jones              | MW238805 (this study)                     |
| Malpighiales | Violaceae    | <i>Melicytus dentatus</i> (R.Br. ex DC.) Molloy & Mabb.          | MW238806 (this study)                     |
| Malpighiales | Violaceae    | <i>Melicytus drucei</i> Molloy & B.D.Clarkson                    | MW238807 (this study)                     |
| Malpighiales | Violaceae    | <i>Melicytus flexuosus</i> Molloy & A.P.Druce                    | MW238808 (this study)                     |
| Malpighiales | Violaceae    | <i>Melicytus lanceolatus</i> Hook.f.                             | MW238809 (this study)                     |
| Malpighiales | Violaceae    | <i>Melicytus micranthus</i> Hook.f.                              | MW238810 (this study)                     |
| Malpighiales | Violaceae    | <i>Melicytus novae-zelandiae</i> (A.Cunn.) P.S.Green             | MW238811 (this study)                     |
| Malpighiales | Violaceae    | <i>Melicytus obovatus</i> (Kirk) Garn.-Jones                     | MW238812 (this study)                     |
| Malpighiales | Violaceae    | <i>Melicytus ramiflorus</i> J.R.Forst. & G.Forst.                | MW238813 (this study)                     |
| Malvales     | Malvaceae    | <i>Gynatrix pulchella</i> (Willd.) Alef.                         | MW194054 (this study)                     |
| Malvales     | Malvaceae    | <i>Hoheria angustifolia</i> Raoul                                | MW194055 (this study)                     |
| Malvales     | Malvaceae    | <i>Hoheria glabrata</i> Sprague & Summerh.                       | MW194056 (this study)                     |
| Malvales     | Malvaceae    | <i>Hoheria lyallii</i> Hook. f.                                  | MW194057 (this study)                     |
| Malvales     | Malvaceae    | <i>Hoheria ovata</i> Simpson & J.S.Thomson                       | MW194058 (this study)                     |
| Malvales     | Malvaceae    | <i>Hoheria populnea</i> A.Cunn.                                  | MW194059 (this study)                     |
| Malvales     | Malvaceae    | <i>Hoheria sexstylosa</i> Colenso                                | MW194060 (this study)                     |
| Malvales     | Malvaceae    | <i>Lawrencia glomerata</i> Hook.                                 | MW194061 (this study)                     |
| Malvales     | Malvaceae    | <i>Lawrencia spicata</i> Hook.                                   | MW194062 (this study)                     |
| Malvales     | Malvaceae    | <i>Plagianthus divaricatus</i> J.R.Forst. & G.Forst.             | MW194063 (this study)                     |
| Malvales     | Malvaceae    | <i>Plagianthus regius</i> (Poit.) Hochr. subsp. <i>regius</i>    | MW194064 (this study)                     |
| Malvales     | Malvaceae    | <i>Plagianthus squamatus</i> (Nees) Benth.                       | MW194065 (this study)                     |
| Myrtales     | Combretaceae | <i>Terminalia guyanensis</i> Eichler                             | MK726027 (Gonçalves <i>et al.</i> , 2019) |
| Myrtales     | Myrtaceae    | <i>Heteropyxis natalensis</i> Harv.                              | MK726014 (Gonçalves <i>et al.</i> , 2019) |
| Myrtales     | Myrtaceae    | <i>Lenwebbia lasioclada</i> (F.Muell.) N.Snow & Guymer           | MW214667 (this study)                     |
| Myrtales     | Myrtaceae    | <i>Lenwebbia prominens</i> N.Snow & Guymer                       | MW214668 (this study)                     |
| Myrtales     | Myrtaceae    | <i>Lophomyrtus bullata</i> Burret                                | MW214669 (this study)                     |

|              |                |                                                          |                                     |
|--------------|----------------|----------------------------------------------------------|-------------------------------------|
| Myrtales     | Myrtaceae      | <i>Lophomyrtus obcordata</i> (Raoul) Burret              | MW214670 (this study)               |
| Myrtales     | Myrtaceae      | <i>Neomyrtus pedunculata</i> (Hook.f.) Allan             | MW214671 (this study)               |
| Oxalidales   | Elaeocarpaceae | <i>Aristolelia australasica</i> F. Muell.                | MW218455 (this study)               |
| Oxalidales   | Elaeocarpaceae | <i>Aristolelia chilensis</i> (Molina) Stuntz             | MW218456 (this study)               |
| Oxalidales   | Elaeocarpaceae | <i>Aristolelia fruticosa</i> Hook.f.                     | MW218457 (this study)               |
| Oxalidales   | Elaeocarpaceae | <i>Aristolelia peduncularis</i> (Labill.) Hook.f.        | MW218458 (this study)               |
| Oxalidales   | Elaeocarpaceae | <i>Aristolelia serrata</i> (J.R.Forst. & G.Forst.) Oliv. | MW218459 (this study)               |
| Oxalidales   | Elaeocarpaceae | <i>Elaeocarpus alaternoides</i> Brongn. & Gris           | MW218460 (this study)               |
| Oxalidales   | Elaeocarpaceae | <i>Elaeocarpus arnhemicus</i> F. Muell.                  | MW218461 (this study)               |
| Oxalidales   | Elaeocarpaceae | <i>Elaeocarpus dentatus</i> (J.R.Forst. & G.Forst.) Vahl | MW218462 (this study)               |
| Oxalidales   | Elaeocarpaceae | <i>Elaeocarpus holopetalus</i> F. Muell.                 | MW218463 (this study)               |
| Oxalidales   | Elaeocarpaceae | <i>Elaeocarpus hookerianus</i> Raoul                     | MW218464 (this study)               |
| Oxalidales   | Elaeocarpaceae | <i>Elaeocarpus reticulatus</i> Sm.                       | MW218465 (this study)               |
| Oxalidales   | Elaeocarpaceae | <i>Elaeocarpus rotundifolius</i> Brongn. & Gris          | MW218466 (this study)               |
| Oxalidales   | Elaeocarpaceae | <i>Elaeocarpus sedentarius</i> Maynard & Crayn           | MW218467 (this study)               |
| Oxalidales   | Elaeocarpaceae | <i>Vallea stipularis</i> L.f.                            | MW218468 (this study)               |
| Ranunculales | Ranunculaceae  | <i>Ranunculus sceleratus</i> L.                          | MK253452 (He <i>et al.</i> , 2019)  |
| Rosales      | Moraceae       | <i>Pseudomorus brunoniana</i> (Endl.) Bureau             | MW238797 (this study)               |
| Rosales      | Moraceae       | <i>Streblus banksii</i> (Cheeseman) C.J.Webb             | MW238798 (this study)               |
| Rosales      | Moraceae       | <i>Streblus glaber</i> (Merr.) Corner                    | MW238799 (this study)               |
| Rosales      | Moraceae       | <i>Streblus heterophyllus</i> (Blume) Corner             | MW238800 (this study)               |
| Rosales      | Moraceae       | <i>Streblus pendulinus</i> (Endl.) F. Muell.             | MW238801 (this study)               |
| Rosales      | Moraceae       | <i>Streblus smithii</i> (Cheeseman) Corner               | MW238802 (this study)               |
| Rosales      | Rhamnaceae     | <i>Discaria chacaye</i> (G. Don) Tortosa                 | MW148941 (this study)               |
| Rosales      | Rhamnaceae     | <i>Discaria nitida</i> Tortosa                           | MW148942 (this study)               |
| Rosales      | Rhamnaceae     | <i>Discaria toumatou</i> Raoul                           | MW148943 (this study)               |
| Rosales      | Rhamnaceae     | <i>Rhamnus taquetii</i> (H.L.v.) H.L.v.                  | MN901522 (Jin <i>et al.</i> , 2020) |
| Sapindales   | Rutaceae       | <i>Melicope elleryana</i> (F. Muell.) T.G. Hartley       | MW221968 (this study)               |
| Sapindales   | Rutaceae       | <i>Melicope lucida</i> (A. Gray) A.C. Sm.                | MW221969 (this study)               |
| Sapindales   | Rutaceae       | <i>Melicope micrococca</i> (F. Muell.) T.G. Hartley      | MW221970 (this study)               |
| Sapindales   | Rutaceae       | <i>Melicope simplex</i> A. Cunn.                         | MW221971 (this study)               |
| Sapindales   | Rutaceae       | <i>Melicope tahitensis</i> Nadeaud                       | MW221972 (this study)               |
| Sapindales   | Rutaceae       | <i>Melicope ternata</i> J.R.Forst. & G.Forst.            | MW221973 (this study)               |
| Sapindales   | Rutaceae       | <i>Melicope vitiflora</i> (F. Muell.) T.G. Hartley       | MW221974 (this study)               |



## References

- Barreda VD, Palazzesi L, Tellería MC, Olivero EB, Raine JI, Forest F. 2015.** Early evolution of the angiosperm clade Asteraceae in the Cretaceous of Antarctica. *Proceedings of the National Academy of Sciences* **112**: 10989–10994.
- Basinger JF, Dilcher DL. 1984.** Ancient bisexual flowers. *Science* **224**: 511–513.
- Beaulieu JM, O'Meara BC, Crane P, Donoghue MJ. 2015.** Heterogeneous rates of molecular evolution and diversification could explain the Triassic age estimate for angiosperms. *Systematic biology* **64**: 869–878.
- Cohen K, Finney S, Gibbard P, Fan J-X. 2013.** The ICS international chronostratigraphic chart v2020/01. *Episodes* **36**: 199–204.
- Collinson M. 1988.** The special significance of the Middle Eocene fruit and seed flora from Messel, West Germany. *Courier Forschungsinstitut Senckenberg* **107**: 187–197.
- Collinson ME, Manchester SR, Wilde V. 2012.** *Fossil fruits and seeds of the Middle Eocene Messel biota, Germany*. Senckenbergische Naturforschende Gesellschaft.
- Crane PR, Manchester SR, Dilcher DL. 1990.** A preliminary survey of fossil leaves and well-preserved reproductive structures from the Sentinel Butte Formation (Paleocene) near Almont, North Dakota. *Fieldiana Geology New Series* **20**: 1–63.
- Dillhoff RM, Dillhoff TA, Dunn RE, Myers JA, Strömberg CA. 2009.** Cenozoic paleobotany of the John Day Basin, central Oregon. *Volcanoes to Vineyards: geologic field trips through the dynamic landscape of the Pacific Northwest: Geological Society of America Field Guide* **15**: 135–164.
- Downie SR, Jansen RK. 2015.** A comparative analysis of whole plastid genomes from the Apiales: expansion and contraction of the inverted repeat, mitochondrial to plastid transfer of DNA, and identification of highly divergent noncoding regions. *Systematic Botany* **40**: 336–351.
- Doyle JA, Endress PK. 2010.** Integrating Early Cretaceous fossils into the phylogeny of living angiosperms: Magnoliidae and eudicots. *Journal of Systematics and Evolution* **48**: 1–35.
- Fossilworks. n.d.** Puercan age/stage. *Fossilworks: Gateway to the Paleobiology Database*. [WWW document] URL [http://fossilworks.org/bridge.pl?action=displayInterval&interval\\_no=236](http://fossilworks.org/bridge.pl?action=displayInterval&interval_no=236) [accessed 8 July 2020]
- Friis EM, Crane PR, Pedersen KR. 2011.** *Early flowers and angiosperm evolution*. Cambridge University Press.
- Gonçalves DJ, Simpson BB, Ortiz EM, Shimizu GH, Jansen RK. 2019.** Incongruence between gene trees and species trees and phylogenetic signal variation in plastid genes. *Molecular Phylogenetics and Evolution* **138**: 219–232.
- Gruenstaeudl M, Jenke N. 2020.** PACVr: plastome assembly coverage visualization in R. *BMC Bioinformatics* **21**: 1–21.

- He J, Yao M, Lyu R-D, Lin L-L, Liu H-J, Pei L-Y, Yan S-X, Xie L, Cheng J. 2019.** Structural variation of the complete chloroplast genome and plastid phylogenomics of the genus *Asteropyrum* (Ranunculaceae). *Scientific reports* **9**: 1–13.
- Herendeen PS, Crepet WL, Dilcher DL. 1992.** The fossil history of the Leguminosae: phylogenetic and biogeographic implications. In: Herendeen PS, Dilcher DL, eds. *Advances in Legume Systematics: Part 4 The Fossil Record*. Kew: Royal Botanic Gardens, 303–316.
- Janssens SB, Couvreur TL, Mertens A, Dauby G, Dagallier L-PM, Abeele SV, Vandeloek F, Mascarello M, Beeckman H, Sosef M. 2020.** A large-scale species level dated angiosperm phylogeny for evolutionary and ecological analyses. *Biodiversity Data Journal* **8**: e39677.
- Jin D-P, Park J-W, Park J-S, Choi B-H. 2020.** The complete plastid genome of *Rhamnus taquetii*, an endemic shrub on the Jeju Island of Korea. *Mitochondrial DNA Part B* **5**: 924–926.
- Lenz OK, Wilde V, Mertz DF, Riegel W. 2015.** New palynology-based astronomical and revised 40 Ar/39 Ar ages for the Eocene maar lake of Messel (Germany). *International Journal of Earth Sciences* **104**: 873–889.
- Li H-T, Yi T-S, Gao L-M, Ma P-F, Zhang T, Yang J-B, Gitzendanner MA, Fritsch PW, Cai J, Luo Y. 2019.** Origin of angiosperms and the puzzle of the Jurassic gap. *Nature Plants* **5**: 461.
- Magallón S, Gómez-Acevedo S, Sánchez-Reyes LL, Hernández-Hernández T. 2015.** A metacalibrated time-tree documents the early rise of flowering plant phylogenetic diversity. *New Phytologist* **207**: 437–453.
- Manchester SR. 1994.** Fruits and seeds of the Middle Eocene nut beds flora, Clarno Formation, Oregon. *Palæontographica Americana* **58**: 1–205.
- Manchester SR. 1999.** Biogeographical relationships of North American tertiary floras. *Annals of the Missouri Botanical Garden* **86**: 472–522.
- Manchester SR, Collinson ME, Soriano C, Sykes D. 2017.** Homologous fruit characters in geographically separated genera of extant and fossil Torricelliaceae (Apiales). *International Journal of Plant Sciences* **178**: 567–579.
- Manchester SR, Kapgate DK, Patil SP, Ramteke D, Matsunaga KK, Smith SY. 2020.** Morphology and Affinities of *Pantocarpon* Fruits (cf. Apiales: Torricelliaceae) from the Maastrichtian Deccan Intertrappean Beds of Central India. *International Journal of Plant Sciences* **181**: 443–451.
- Manchester SR, Kvaček Z. 2009.** Fruits of *Sloanea* (Elaeocarpaceae) in the Paleogene of North America and Greenland. *International journal of plant sciences* **170**: 941–950.
- Martínez-Millán M, Crepet WL, Nixon KC. 2009.** *Pentapetalum trifasciculandricus* gen. et sp. nov., a thealean fossil flower from the Raritan Formation, New Jersey, USA (Turonian, Late Cretaceous). *American Journal of Botany* **96**: 933–949.
- Maurin KJL. 2020.** A dated phylogeny of the genus *Pennantia* (Pennantiaceae) based on whole chloroplast genome and nuclear ribosomal 18S–26S repeat region sequences. *PhytoKeys* **155**: 15–32.



- Nixon KC, Crepet WL. 1993.** Late Cretaceous fossil flowers of ericalean affinity. *American Journal of Botany* **80**: 616–623.
- Olivero EB. 2012.** Sedimentary cycles, ammonite diversity and palaeoenvironmental changes in the Upper Cretaceous Marambio Group, Antarctica. *Cretaceous Research* **34**: 348–366.
- Pigg KB, Stockey RA, Maxwell SL. 1993.** *Paleomyrtinaea*, a new genus of permineralized myrtaceous fruits and seeds from the Eocene of British Columbia and Paleocene of North Dakota. *Canadian Journal of Botany* **71**: 1–9.
- Plunkett G, Xiang Q-Y, Lowry P, Schatz G. 2018.** Torricelliaceae. In: Kadereit J, Bittrich V, eds. *Flowering Plants. Eudicots*. Springer, 549–556.
- Ramírez-Barahona S, Sauquet H, Magallón S. 2020.** The delayed and geographically heterogeneous diversification of flowering plant families. *Nature Ecology & Evolution* **4**: 1232–1238.
- Stevens P. 2017.** Angiosperm Phylogeny Website. Version 14. Ranunculales—Eudicots. *Angiosperm Phylogeny Website. Version 14*. [WWW document] URL <http://www.mobot.org/mobot/research/apweb/orders/ranunculalesweb.htm#Eudicots> [accessed 22 July 2020]
- Takahashi M, Crane PR, Ando H. 1999.** *Esgueiria futabensis* sp. nov., a new angiosperm flower from the Upper Cretaceous (lower Coniacian) of northeastern Honshu, Japan. *Paleontological Research* **3**: 81–87.
- Tosso F, Hardy OJ, Doucet J-L, Dainou K, Kaymak E, Migliore J. 2018.** Evolution in the Amphi-Atlantic tropical genus *Guibourtia* (Fabaceae, Detarioideae), combining NGS phylogeny and morphology. *Molecular Phylogenetics and Evolution* **120**: 83–93.
- Wang Q, Li W-Q, Ding B, Deng H-P. 2019.** Characterization of the complete chloroplast genome sequence of *Impatiens pritzelii* (Balsaminaceae): an endemic species from China. *Mitochondrial DNA Part B* **4**: 4073–4074.
- Wang Y-H, Wang H, Yi T-S, Wang Y-H. 2017.** The complete chloroplast genomes of *Adenolobus garipensis* and *Cercis glabra* (Cercidoideae, Fabaceae). *Conservation Genetics Resources* **9**: 635–638.
- Yao G, Jin J-J, Li H-T, Yang J-B, Mandala VS, Croley M, Mostow R, Douglas NA, Chase MW, Christenhusz MJ. 2019.** Plastid phylogenomic insights into the evolution of Caryophyllales. *Molecular Phylogenetics and Evolution* **134**: 74–86.
- Zhang R, Wang Y-H, Jin J-J, Stull GW, Bruneau A, Cardoso D, De Queiroz LP, Moore MJ, Zhang S-D, Chen S-Y. 2020.** Exploration of plastid phylogenomic conflict yields new insights into the deep relationships of Leguminosae. *Systematic Biology* **69**: 613–622.
